# Supplementary material
Source: PubMed Central journal article supplement (PMC8383210)
Supplement: NIHMS1719028-supplement-Suppl_Table_3.pdf [file NIHMS1719028-supplement-Suppl_Table_3.pdf]

Supplemental Table 3: Detailed results from analysis of LSRs in subjects with vs. without prevalent VFx (SQ2+) for nine key activities

First performed a 2-way repeated-measures ANOVA for VFx and Level, then post-hoc contrasts by level with Bonferroni corrections if VFx or interaction was significant.

| Activity 19   |         | LSR     |       |                                                  |       |       |       |         |         |         |         |       |         |         |       |  |
|---------------|---------|---------|-------|--------------------------------------------------|-------|-------|-------|---------|---------|---------|---------|-------|---------|---------|-------|--|
|               |         | N       | T4    | T5                                               | T6    | T7    | T8    | T9      | T10     | T11     | T12     | L1    | L2      | L3      | L4    |  |
| No VFx        | Mean    | 112     | 0.178 | 0.207                                            | 0.231 | 0.240 | 0.252 | 0.262   | 0.277   | 0.303   | 0.355   | 0.368 | 0.338   | 0.348   | 0.335 |  |
|               | SD      |         | 0.067 | 0.076                                            | 0.086 | 0.084 | 0.083 | 0.082   | 0.090   | 0.091   | 0.107   | 0.119 | 0.100   | 0.110   | 0.100 |  |
| Prevalent VFx | Mean    | 17      | 0.190 | 0.228                                            | 0.249 | 0.248 | 0.290 | 0.300   | 0.355   | 0.384   | 0.427   | 0.436 | 0.386   | 0.411   | 0.444 |  |
|               | SD      |         | 0.085 | 0.132                                            | 0.134 | 0.093 | 0.150 | 0.189   | 0.210   | 0.213   | 0.225   | 0.229 | 0.210   | 0.214   | 0.352 |  |
| ANOVA         |         | p-value |       | Post-hoc contrast p-value (Bonferroni corrected) |       |       |       |         |         |         |         |       |         |         |       |  |
| VFx           | 0.0495  | 1       | 1     | 1                                                | 1     | 0.126 | 0.135 | <0.0001 | <0.0001 | <0.0001 | <0.0001 | 0.017 | <0.0001 | <0.0001 |       |  |
| Level         | <0.0001 |         |       |                                                  |       |       |       |         |         |         |         |       |         |         |       |  |
| VFx x Level   | <0.0001 |         |       |                                                  |       |       |       |         |         |         |         |       |         |         |       |  |

| Activity 11   |         | LSR     |       |       |       |       |       |       |       |       |       |       |       |       |       |  |
|---------------|---------|---------|-------|-------|-------|-------|-------|-------|-------|-------|-------|-------|-------|-------|-------|--|
|               |         | N       | T4    | T5    | T6    | T7    | T8    | T9    | T10   | T11   | T12   | L1    | L2    | L3    | L4    |  |
| No VFx        | Mean    | 36      | 0.193 | 0.217 | 0.237 | 0.238 | 0.248 | 0.242 | 0.246 | 0.262 | 0.303 | 0.329 | 0.324 | 0.339 | 0.329 |  |
|               | SD      |         | 0.072 | 0.074 | 0.071 | 0.058 | 0.072 | 0.059 | 0.061 | 0.076 | 0.079 | 0.072 | 0.075 | 0.092 | 0.087 |  |
| Prevalent VFx | Mean    | 3       | 0.284 | 0.249 | 0.232 | 0.231 | 0.262 | 0.252 | 0.255 | 0.290 | 0.333 | 0.354 | 0.315 | 0.325 | 0.289 |  |
|               | SD      |         | 0.170 | 0.114 | 0.084 | 0.056 | 0.118 | 0.121 | 0.124 | 0.087 | 0.125 | 0.148 | 0.139 | 0.196 | 0.091 |  |
| ANOVA         |         | p-value |       |       |       |       |       |       |       |       |       |       |       |       |       |  |
| VFx           | 0.7418  |         |       |       |       |       |       |       |       |       |       |       |       |       |       |  |
| Level         | <0.0001 |         |       |       |       |       |       |       |       |       |       |       |       |       |       |  |
| VFx x Level   | 0.2338  |         |       |       |       |       |       |       |       |       |       |       |       |       |       |  |

| Activity 9    |         | LSR     |       |                                                  |       |         |         |         |         |         |         |         |         |         |       |  |
|---------------|---------|---------|-------|--------------------------------------------------|-------|---------|---------|---------|---------|---------|---------|---------|---------|---------|-------|--|
|               |         | N       | T4    | T5                                               | T6    | T7      | T8      | T9      | T10     | T11     | T12     | L1      | L2      | L3      | L4    |  |
| No VFx        | Mean    | 147     | 0.190 | 0.208                                            | 0.216 | 0.236   | 0.270   | 0.277   | 0.289   | 0.303   | 0.313   | 0.282   | 0.236   | 0.230   | 0.214 |  |
|               | SD      |         | 0.071 | 0.084                                            | 0.085 | 0.082   | 0.095   | 0.092   | 0.096   | 0.096   | 0.099   | 0.092   | 0.076   | 0.078   | 0.063 |  |
| Prevalent VFx | Mean    | 23      | 0.210 | 0.243                                            | 0.253 | 0.261   | 0.323   | 0.334   | 0.378   | 0.390   | 0.393   | 0.359   | 0.299   | 0.300   | 0.289 |  |
|               | SD      |         | 0.086 | 0.113                                            | 0.107 | 0.090   | 0.145   | 0.173   | 0.205   | 0.201   | 0.194   | 0.172   | 0.153   | 0.148   | 0.210 |  |
| ANOVA         |         | p-value |       | Post-hoc contrast p-value (Bonferroni corrected) |       |         |         |         |         |         |         |         |         |         |       |  |
| VFx           | 0.0026  | 0.996   | 0.017 | 0.011                                            | 0.322 | <0.0001 | <0.0001 | <0.0001 | <0.0001 | <0.0001 | <0.0001 | <0.0001 | <0.0001 | <0.0001 |       |  |
| Level         | <0.0001 |         |       |                                                  |       |         |         |         |         |         |         |         |         |         |       |  |
| VFx x Level   | <0.0001 |         |       |                                                  |       |         |         |         |         |         |         |         |         |         |       |  |

Supplemental Table 3 (continued)

| Activity 15   |         | LSR                                              |       |       |       |       |       |       |         |         |         |         |       |         |       |
|---------------|---------|--------------------------------------------------|-------|-------|-------|-------|-------|-------|---------|---------|---------|---------|-------|---------|-------|
|               |         | N                                                | T4    | T5    | T6    | T7    | T8    | T9    | T10     | T11     | T12     | L1      | L2    | L3      | L4    |
| No VFx        | Mean    | 134                                              | 0.191 | 0.208 | 0.216 | 0.240 | 0.274 | 0.275 | 0.289   | 0.307   | 0.318   | 0.287   | 0.236 | 0.226   | 0.210 |
|               | SD      |                                                  | 0.073 | 0.088 | 0.088 | 0.085 | 0.098 | 0.096 | 0.102   | 0.104   | 0.106   | 0.095   | 0.079 | 0.080   | 0.066 |
| Prevalent VFx | Mean    | 21                                               | 0.207 | 0.233 | 0.242 | 0.258 | 0.307 | 0.304 | 0.361   | 0.382   | 0.378   | 0.342   | 0.281 | 0.278   | 0.251 |
|               | SD      |                                                  | 0.068 | 0.084 | 0.076 | 0.079 | 0.116 | 0.112 | 0.194   | 0.196   | 0.154   | 0.121   | 0.116 | 0.117   | 0.114 |
| ANOVA         |         | Post-hoc contrast p-value (Bonferroni corrected) |       |       |       |       |       |       |         |         |         |         |       |         |       |
| VFx           | p-value |                                                  | 1     | 0.39  | 0.373 | 1     | 0.065 | 0.151 | <0.0001 | <0.0001 | <0.0001 | <0.0001 | 0.002 | <0.0001 | 0.006 |
| Level         |         | <0.0001                                          |       |       |       |       |       |       |         |         |         |         |       |         |       |
| VFx x Level   |         | 0.0007                                           |       |       |       |       |       |       |         |         |         |         |       |         |       |

| Activity 16   |         | LSR                                              |       |       |       |       |       |       |       |       |       |       |       |       |       |
|---------------|---------|--------------------------------------------------|-------|-------|-------|-------|-------|-------|-------|-------|-------|-------|-------|-------|-------|
|               |         | N                                                | T4    | T5    | T6    | T7    | T8    | T9    | T10   | T11   | T12   | L1    | L2    | L3    | L4    |
| No VFx        | Mean    | 126                                              | 0.222 | 0.230 | 0.241 | 0.229 | 0.218 | 0.205 | 0.200 | 0.206 | 0.215 | 0.192 | 0.160 | 0.156 | 0.149 |
|               | SD      |                                                  | 0.077 | 0.083 | 0.084 | 0.077 | 0.070 | 0.068 | 0.068 | 0.068 | 0.068 | 0.059 | 0.054 | 0.053 | 0.048 |
| Prevalent VFx | Mean    | 21                                               | 0.242 | 0.256 | 0.268 | 0.251 | 0.253 | 0.233 | 0.246 | 0.249 | 0.251 | 0.228 | 0.183 | 0.182 | 0.192 |
|               | SD      |                                                  | 0.088 | 0.132 | 0.126 | 0.093 | 0.123 | 0.142 | 0.153 | 0.139 | 0.132 | 0.113 | 0.091 | 0.089 | 0.142 |
| ANOVA         |         | Post-hoc contrast p-value (Bonferroni corrected) |       |       |       |       |       |       |       |       |       |       |       |       |       |
| VFx           | p-value |                                                  | 1     | 0.056 | 0.056 | 0.056 | 0.056 | 0.056 | 0.056 | 0.056 | 0.056 | 0.056 | 0.056 | 0.056 | 0.056 |
| Level         |         | <0.0001                                          |       |       |       |       |       |       |       |       |       |       |       |       |       |
| VFx x Level   |         | 0.4386                                           |       |       |       |       |       |       |       |       |       |       |       |       |       |

| Activity 61   |         | LSR                                              |       |       |       |       |       |       |         |         |         |         |         |         |         |
|---------------|---------|--------------------------------------------------|-------|-------|-------|-------|-------|-------|---------|---------|---------|---------|---------|---------|---------|
|               |         | N                                                | T4    | T5    | T6    | T7    | T8    | T9    | T10     | T11     | T12     | L1      | L2      | L3      | L4      |
| No VFx        | Mean    | 146                                              | 0.132 | 0.153 | 0.168 | 0.173 | 0.184 | 0.191 | 0.200   | 0.220   | 0.251   | 0.254   | 0.232   | 0.240   | 0.231   |
|               | SD      |                                                  | 0.045 | 0.050 | 0.054 | 0.055 | 0.059 | 0.060 | 0.060   | 0.065   | 0.071   | 0.078   | 0.071   | 0.075   | 0.066   |
| Prevalent VFx | Mean    | 23                                               | 0.144 | 0.172 | 0.187 | 0.184 | 0.211 | 0.217 | 0.247   | 0.269   | 0.298   | 0.303   | 0.276   | 0.292   | 0.291   |
|               | SD      |                                                  | 0.054 | 0.074 | 0.075 | 0.054 | 0.084 | 0.105 | 0.122   | 0.126   | 0.133   | 0.131   | 0.127   | 0.129   | 0.195   |
| ANOVA         |         | Post-hoc contrast p-value (Bonferroni corrected) |       |       |       |       |       |       |         |         |         |         |         |         |         |
| VFx           | p-value |                                                  | 1     | 0.365 | 0.315 | 1     | 0.027 | 0.048 | <0.0001 | <0.0001 | <0.0001 | <0.0001 | <0.0001 | <0.0001 | <0.0001 |
| Level         |         | <0.0001                                          |       |       |       |       |       |       |         |         |         |         |         |         |         |
| VFx x Level   |         | <0.0001                                          |       |       |       |       |       |       |         |         |         |         |         |         |         |

Supplemental Table 3 (concluded)

| Activity 118  |         | LSR                                              |       |       |       |       |       |       |       |       |       |       |       |       |         |
|---------------|---------|--------------------------------------------------|-------|-------|-------|-------|-------|-------|-------|-------|-------|-------|-------|-------|---------|
|               |         | N                                                | T4    | T5    | T6    | T7    | T8    | T9    | T10   | T11   | T12   | L1    | L2    | L3    | L4      |
| No VFx        | Mean    | 145                                              | 0.179 | 0.198 | 0.186 | 0.174 | 0.178 | 0.168 | 0.168 | 0.170 | 0.162 | 0.161 | 0.169 | 0.183 | 0.169   |
|               | SD      |                                                  | 0.075 | 0.086 | 0.086 | 0.079 | 0.079 | 0.075 | 0.074 | 0.071 | 0.066 | 0.063 | 0.063 | 0.063 | 0.053   |
| Prevalent VFx | Mean    | 23                                               | 0.190 | 0.204 | 0.186 | 0.173 | 0.190 | 0.173 | 0.185 | 0.186 | 0.176 | 0.180 | 0.191 | 0.216 | 0.208   |
|               | SD      |                                                  | 0.070 | 0.071 | 0.066 | 0.053 | 0.071 | 0.072 | 0.078 | 0.078 | 0.073 | 0.065 | 0.078 | 0.091 | 0.135   |
| ANOVA         |         | Post-hoc contrast p-value (Bonferroni corrected) |       |       |       |       |       |       |       |       |       |       |       |       |         |
| VFx           | p-value |                                                  |       |       |       |       |       |       |       |       |       |       |       |       |         |
| Level         | <0.0001 | 1                                                | 1     | 1     | 1     | 1     | 1     | 1     | 0.473 | 0.584 | 1     | 0.284 | 0.077 | 0.001 | <0.0001 |
| VFx x Level   | 0.0144  |                                                  |       |       |       |       |       |       |       |       |       |       |       |       |         |

| Activity 116  |         | LSR                                              |       |       |       |       |       |       |       |       |       |       |       |       |       |
|---------------|---------|--------------------------------------------------|-------|-------|-------|-------|-------|-------|-------|-------|-------|-------|-------|-------|-------|
|               |         | N                                                | T4    | T5    | T6    | T7    | T8    | T9    | T10   | T11   | T12   | L1    | L2    | L3    | L4    |
| No VFx        | Mean    | 140                                              | 0.154 | 0.170 | 0.173 | 0.142 | 0.121 | 0.115 | 0.117 | 0.122 | 0.123 | 0.104 | 0.083 | 0.079 | 0.074 |
|               | SD      |                                                  | 0.072 | 0.083 | 0.087 | 0.077 | 0.059 | 0.055 | 0.060 | 0.059 | 0.059 | 0.046 | 0.036 | 0.033 | 0.029 |
| Prevalent VFx | Mean    | 21                                               | 0.163 | 0.176 | 0.179 | 0.141 | 0.129 | 0.124 | 0.121 | 0.125 | 0.132 | 0.115 | 0.093 | 0.089 | 0.085 |
|               | SD      |                                                  | 0.065 | 0.092 | 0.081 | 0.047 | 0.077 | 0.093 | 0.073 | 0.067 | 0.083 | 0.067 | 0.056 | 0.051 | 0.066 |
| ANOVA         |         | Post-hoc contrast p-value (Bonferroni corrected) |       |       |       |       |       |       |       |       |       |       |       |       |       |
| VFx           | p-value |                                                  |       |       |       |       |       |       |       |       |       |       |       |       |       |
| Level         | <0.0001 |                                                  |       |       |       |       |       |       |       |       |       |       |       |       |       |
| VFx x Level   | 0.9948  |                                                  |       |       |       |       |       |       |       |       |       |       |       |       |       |

| Activity 73   |         | LSR                                              |       |       |       |       |       |         |       |       |       |         |         |         |         |
|---------------|---------|--------------------------------------------------|-------|-------|-------|-------|-------|---------|-------|-------|-------|---------|---------|---------|---------|
|               |         | N                                                | T4    | T5    | T6    | T7    | T8    | T9      | T10   | T11   | T12   | L1      | L2      | L3      | L4      |
| No VFx        | Mean    | 121                                              | 0.130 | 0.151 | 0.167 | 0.168 | 0.173 | 0.178   | 0.188 | 0.210 | 0.245 | 0.253   | 0.233   | 0.245   | 0.236   |
|               | SD      |                                                  | 0.049 | 0.055 | 0.059 | 0.058 | 0.058 | 0.058   | 0.059 | 0.062 | 0.072 | 0.078   | 0.073   | 0.084   | 0.074   |
| Prevalent VFx | Mean    | 14                                               | 0.130 | 0.163 | 0.171 | 0.163 | 0.194 | 0.202   | 0.233 | 0.253 | 0.289 | 0.304   | 0.280   | 0.302   | 0.306   |
|               | SD      |                                                  | 0.067 | 0.088 | 0.080 | 0.066 | 0.099 | 0.117   | 0.147 | 0.150 | 0.151 | 0.149   | 0.151   | 0.163   | 0.244   |
| ANOVA         |         | Post-hoc contrast p-value (Bonferroni corrected) |       |       |       |       |       |         |       |       |       |         |         |         |         |
| VFx           | p-value |                                                  |       |       |       |       |       |         |       |       |       |         |         |         |         |
| Level         | <0.0001 | 1                                                | 1     | 1     | 1     | 0.699 | 0.308 | <0.0001 | 0.001 | 0.001 | 0.001 | <0.0001 | <0.0001 | <0.0001 | <0.0001 |
| VFx x Level   | <0.0001 |                                                  |       |       |       |       |       |         |       |       |       |         |         |         |         |
